# Optimal Design of Single-Cell Experiments within Temporally Fluctuating Environments

Zachary R Fox

*Inria Saclay Ile-de-France, Palaiseau 91120, France*

*Institut Pasteur, USR 3756 IP CNRS Paris, 75015, France*

*School of Biomedical Engineering, Colorado State*

*University Fort Collins, CO 80523, USA and*

*zachrfox@gmail.com*

Gregor Neuert

*Department of Molecular Physiology and Biophysics,*

*School of Medicine, Vanderbilt University, Nashville, TN 37232, USA*

*Department of Biomedical Engineering, School of Engineering,*

*Vanderbilt University, Nashville, TN 37232, USA*

*Department of Pharmacology, School of Medicine,*

*Vanderbilt University, Nashville, TN 37232, USA and*

*gregor.neuert@vanderbilt.edu*

Brian Munsky

*Department of Chemical and Biological Engineering,*

*Colorado State University Fort Collins, CO 80523, USA*

*School of Biomedical Engineering, Colorado State*

*University Fort Collins, CO 80523, USA and*

*brian.munsky@colostate.edu*

(Dated: October 20, 2019)

## Abstract

24

25 Modern biological experiments are becoming increasingly complex, and designing these experi-  
26 ments to yield the greatest possible quantitative insight is an open challenge. Increasingly, compu-  
27 tational models of complex stochastic biological systems are being used to understand and predict  
28 biological behaviors or to infer biological parameters. Such quantitative analyses can also help  
29 to improve experiment designs for particular goals, such as to learn more about specific model  
30 mechanisms or to reduce prediction errors in certain situations. A classic approach to experiment  
31 design is to use the Fisher information matrix (FIM), which quantifies the expected information a  
32 particular experiment will reveal about model parameters. The Finite State Projection based FIM  
33 (FSP-FIM) was recently developed to compute the FIM for discrete stochastic gene regulatory  
34 systems, whose complex response distributions do not satisfy standard assumptions of Gaussian  
35 variations. In this work, we develop the FSP-FIM analysis for a stochastic model of stress response  
36 genes in *S. cerevisiae* under time-varying MAPK induction. We validate this FSP-FIM analysis  
37 and use it to optimize the number of cells that should be quantified at particular times to learn as  
38 much as possible about the model parameters. We then demonstrate how the FSP-FIM approach  
39 can be extended to explore how different measurement times or genetic modifications can help to  
40 minimize uncertainty in the sensing of extracellular environments, such as external salinity mod-  
41 ulations. This work demonstrates the potential of quantitative models to not only make sense of  
42 modern biological data sets, but to close the loop between quantitative modeling and experimental  
43 data collection.

## 44 INTRODUCTION

45 The standard approach to design experiments has been to rely entirely on expert knowl-  
46 edge and intuition. However, as experimental investigations become more complex and  
47 seek to examine systems with more subtle non-linear interactions, it becomes much harder  
48 to improve experimental designs using intuition alone. This issue has become especially  
49 relevant in modern single-cell-single-molecule investigations of gene regulatory processes.  
50 Performing such powerful, yet complicated experiments involves the selection from among  
51 a large number of possible experimental designs, and it is often not clear which designs  
52 will provide the most relevant information. A systematic approach to solve this problem is  
53 model-driven experiment design, in which one uses an assumed (and potentially incorrect)  
54 mathematical model of the system to estimate and optimize the value of potential exper-  
55 imental settings. In recent years, model-driven experiment design has gained traction for  
56 biological models of gene expression, whether in the Bayesian setting [1] or using Fisher  
57 information for deterministic models [2], and even in the stochastic, single-cell setting [3–  
58 6]. Despite the promise and active development of model-driven experiment design from  
59 the theoretical perspective, more general, yet biologically-inspired approaches are needed to  
60 make these methods suitable for the experimental community at large. In this work, we  
61 apply model-driven experiment design to an experimentally validated model of stochastic,  
62 time-varying High Osmolarity Glycerol (HOG) Mitogen Activated Protein Kinase (MAPK)  
63 induction of transcription during osmotic stress response in yeast [7–9]. To demonstrate a  
64 concrete and practical application of model-driven experiment design, we find the optimal  
65 *measurement schedule* (i.e., when measurements ought to be taken) and the appropriate  
66 *number of individual cells* to be measured at each time point.

67 In our computational analyses, we consider the experimental technique of single-mRNA  
68 Fluorescence *in situ* Hybridization (smFISH), where specific fluorescent oligonucleotide  
69 probes are hybridized to mRNA of interest in fixed cells [10, 11]. Cells are then imaged  
70 and the mRNA abundance in each cell can be counted, either by hand or using automated  
71 software such as [12]. Such counting can be a cumbersome process, but little thought has  
72 been given typically to how many cells should be measured and analyzed at each time.  
73 Furthermore, when a dynamic response is under investigation, the specific times at which  
74 measurements should be taken (i.e., the times after induction at which cells should be

75 fixed and analyzed) is also unclear. In this work, we use the newly developed finite state  
76 projection based Fisher information matrix (FSP-FIM, [6]) to optimize these experimental  
77 quantities for osmotic stress response genes in yeast.

78 The HOG-MAPK pathway in yeast is a model system to study dynamics of signal trans-  
79 duction induced gene regulation in single cells [13–18] and stochastic models of HOG-MAPK  
80 activated transcription have been used to predict adaptive transcription responses across  
81 yeast cell populations [8, 9, 19]. In particular, previous studies have measured two stress  
82 response genes, *STL1* and *CTT1*, and used them to infer the model depicted in Fig. 1a.  
83 This calibration and uncertainty quantification process required intense experimental effort  
84 to fix and image tens of thousands of cells at more than a dozen time points and for multi-  
85 ple biological replicas as well as intense computational effort for both the processing of the  
86 smFISH images and the fitting of stochastic kinetic models to the quantified experimental  
87 data. In light of such expenses, we aim to develop methods that can specify experiments that  
88 are equally or more informative, yet which could minimize experimental and computational  
89 efforts.

90 Toward this goal, the first part of our current study demonstrates the use of FSP based  
91 Fisher information to optimize experiments to minimize the uncertainty in stochastic model  
92 parameters for the time varying MAPK-induced gene expression response. In the second  
93 part of this study, we expand upon this result to find the optimal smFISH measurement  
94 times and cell numbers to minimize uncertainty about unknown environmental inputs (e.g.,  
95 salt concentrations) to which the cells are subjected. In this way, we are presenting a  
96 new methodology by which one can optimally examine behaviors of natural cells to obtain  
97 accurate estimations of environmental changes.

## 98 BACKGROUND

### 99 **Finite State Projection models can predict osmotic stress responses in yeast.**

100 Gene regulation is the process by which small molecules, chromatin regulators, and gen-  
101 eral and gene-specific transcription factors interact to regulate the transcription of DNA into  
102 RNA and the translation of mRNA into proteins. Even within populations of genetically  
103 identical cells, these single-molecule processes are stochastic and give rise to cell-to-cell vari-

104 ability in gene expression levels. Adequate description of such variable responses can only  
105 be achieved through the use of stochastic computational models [20–23].

106 In this work, we use the chemical master equation framework [24] of stochastic chemical  
107 kinetics, which has been the workhorse of stochastic modeling of gene expression, whether  
108 through simulated sample paths of its solution via the stochastic simulation algorithm [25],  
109 moment approximations [7, 26], or finite state projections (FSP) [27]. Recently, it has come  
110 to light that for some systems it is critical to consider the full distribution of biomolecules  
111 across cellular populations when fitting CME-based models [6, 9], which can be done with  
112 guaranteed errors using the FSP approach [27, 28]. This method truncates a CME into a  
113 finite state, continuous time Markov chain, for which the set of ordinary differential equa-  
114 tions,  $\frac{d\mathbf{p}}{dt} = \mathbf{A}(t)\mathbf{p}$  describes the flow of probability among all of the most likely observable  
115 states for the system. Details of the FSP approach to solving chemical kinetic systems are  
116 provided in Supplementary Note 1.

117 For signal-activated transcription in the HOG-MAPK stress response pathway in yeast,  
118 an FSP model has been used to fit and predict mRNA distributions at a range of NaCl  
119 concentrations [8, 9]. This model of osmotic stress response consists of transitions between  
120 four different gene states, shown in Fig. 1a. The probability of a transition from the  $i^{\text{th}}$   
121 to the  $j^{\text{th}}$  gene state in the infinitesimal time  $dt$  is given by  $k_{ij}dt$ . Each  $i^{\text{th}}$  state also  
122 has a corresponding mRNA transcription rate,  $k_{ri}$ , but the mRNA degrade with rate  $\gamma$ ,  
123 independent of gene state. Further descriptions and validations of this model are given in  
124 Supplementary Note 1 and in [8, 9, 19]. To accurately fit and predict mRNA levels across cell  
125 populations, the authors in [8] cross-validated across a number of different potential models  
126 with different numbers of gene states and time varying parameters. The most predictive of  
127 these was the model shown in Fig. 1a, in which the transition rate from the second gene  
128 activation state to the first gene activation state is a function of nuclear MAPK levels,  $f(t)$ .  
129 The nuclear localization of MAPK affects this transition with a threshold function,

$$k_{21}(t) = \max[0, \alpha - \beta f(t)], \quad (1)$$

130 where  $\alpha$  and  $\beta$  set the threshold for  $k_{21}(t)$  activation/deactivation. Figure 1b (left) shows  
131 the nuclear localization dynamics of MAPK (i.e.  $f(t)$ ) for osmotic stress responses to 0.2M  
132 and 0.4M NaCl, with simulated nuclear localization dynamics fit to a model (from [9]),

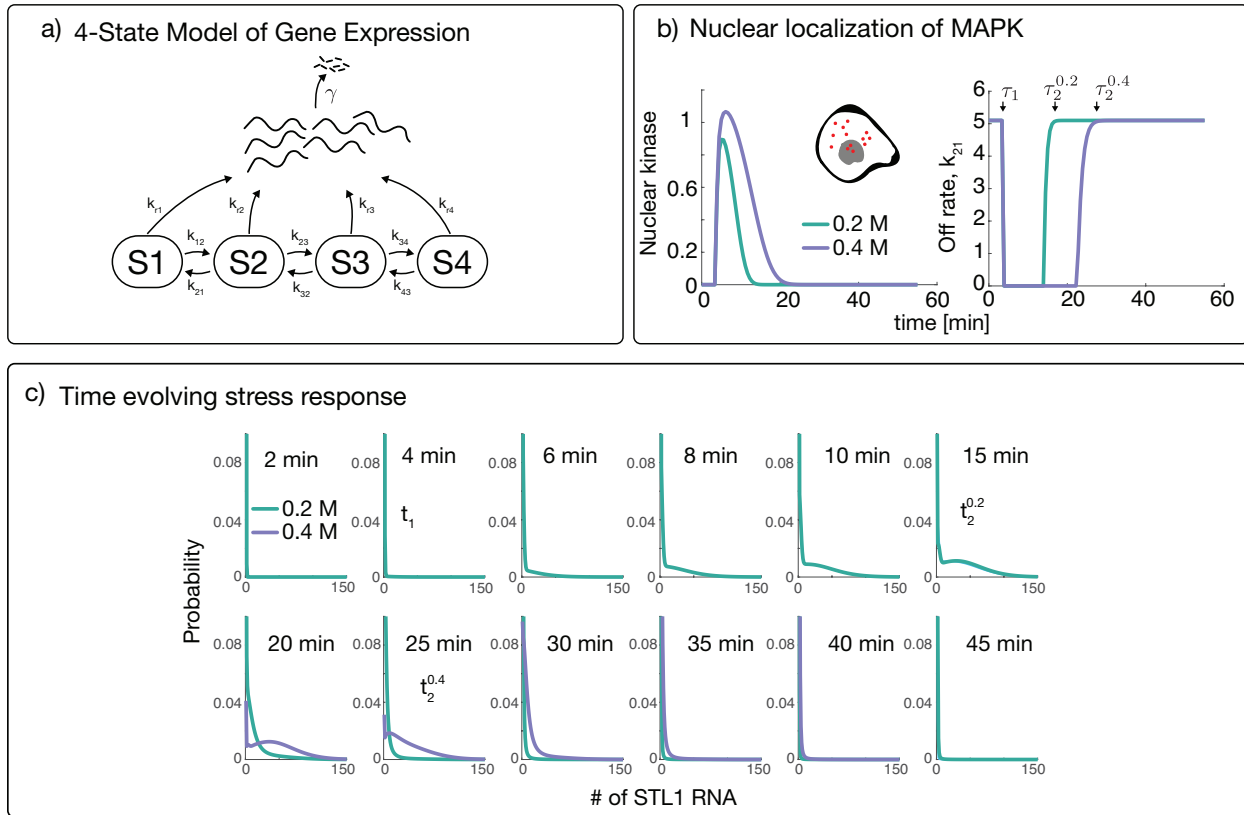

FIG. 1. *Stochastic modeling of osmotic stress response genes in yeast.* (a) Four-state model of gene expression, where each state transcribes mRNA at a different transcription rate, but all mRNA degrade at a single rate  $\gamma$ . (b) The effect of measured MAPK nuclear localization (depicted as red dots in the cell) (left) on the the rate of switching from gene activation state S2 to S1 (right) under 0.2M or 0.4M NaCl osmotic stress. The time at which  $k_{21}$  turns off is denoted with  $\tau_1$  and is independent of the NaCl level. The time at which  $k_{23}$  turns back on is given by  $\tau_2^{\text{NaCl}}$  depending on the level of NaCl. (c) Time evolution of the *STL1* RNA in response to the 0.2M and 0.4M NaCl stress.

133 Supplementary Note 2), and Fig. 1b (right) shows the value of  $k_{21}(t)$  for each salinity level.  
 134 This rate results in a time-varying generator  $\mathbf{A}(t)$  for the master equation dynamics (See  
 135 Supplementary Note 1).

136 **LIKELIHOOD OF SMFISH DATA FOR FSP MODELS**

137 To match FSP model solutions to single-cell data, one needs to compute and maximize  
 138 the likelihood of the smFISH data given the FSP model [8, 9, 19, 28, 29]. We assume  
 139 that measurements at each time point  $\mathbf{t} \equiv [t_1, t_2, \dots, t_{N_t}]$  are independent, as justified by  
 140 the fact that fixation of cells for measurement precludes temporal cell-to-cell correlations.  
 141 Measurements of  $N_c$  cells can be concatenated into a matrix  $\mathbf{D}_t \equiv [\mathbf{d}_1, \mathbf{d}_2, \dots, \mathbf{d}_{N_c}]_t$  of the  
 142 observable mRNA species at each measurement time  $t$ .

143 The likelihood of making the independent observations for all  $N_c$  measured cells is the  
 144 product of the probabilities of observing each cell’s measured state. For most gene expression  
 145 models, however, states are only partially observable, and we define the observed state  $\mathbf{x}_i^L$   
 146 as the marginalization (or lumping) over all full states  $\{\mathbf{x}_j\}_i$  that are indistinguishable from  
 147  $\mathbf{x}_i$  based on the observation. For example, the model of *STL1* transcription consists of four  
 148 gene states (S1-S4, shown in Fig. 1a), which are unobserved, and the measured number of  
 149 mRNA, which is observed. If we let index  $i$  denote the number of mRNA, then the observed  
 150 state  $\mathbf{x}_i^L$  would lump together the full states (S1, $i$ ), (S2, $i$ ), (S3, $i$ ), and (S4, $i$ ). We next define  
 151  $y_i$  as the number of experimental cells that match  $\mathbf{x}_i^L$  at time  $t$ . Under these definitions, the  
 152 likelihood of the observed data (and its logarithm) given the model can be written:

$$\begin{aligned} \ell(\mathbf{D}|\boldsymbol{\theta}) &= M \prod_{t=t_1}^{t_{N_t}} \prod_{i \in \mathcal{J}_D} p(\mathbf{x}_i^L, t|\boldsymbol{\theta})^{y_i} \\ \log \ell(\mathbf{D}|\boldsymbol{\theta}) &= \sum_{t=t_1}^{t_{N_t}} \sum_{i \in \mathcal{J}_D} y_i \log(p(\mathbf{x}_i^L, t|\boldsymbol{\theta})) + \log M, \end{aligned} \quad (2)$$

153 where  $\mathcal{J}_D$  is the set of states observed in the data,  $M$  is a combinatorial prefactor (i.e. from  
 154 a multinomial distribution) that comes from the arbitrary reordering of measured data, and  
 155  $p(\mathbf{x}_i^L)$  is the marginalized probability mass of the observable species,

$$p(\mathbf{x}_i^L) = \sum_{\mathbf{x}_j \in \mathbf{x}_i^L} p(\mathbf{x}_j).$$

156 Neglecting the term  $\log M$ , which is independent of the model, the summation in Eq. 2 can  
 157 be rewritten as a product  $\mathbf{y} \log \mathbf{p}^L$ , where  $\mathbf{y} \equiv [y_0, y_1, \dots]$  is a vector of the binned data  
 158 and  $\mathbf{p}^L = [p(\mathbf{x}_0^L), p(\mathbf{x}_1^L), \dots]^T$  is the corresponding marginalized probability mass vector.

159 One may then maximize Eq. 2 with respect to  $\theta$  to find the *maximum likelihood estimates*  
160 (MLE) of the parameters,  $\hat{\theta}$ , which will vary depending on each new set of experimental  
161 data. We next demonstrate how this likelihood function and the FSP model of the HOG-  
162 MAPK system can be used to design optimal smFISH experiments using the FSP-based  
163 FIM [6].

### 164 **The Finite State Projection based Fisher information for models of signal-activated** 165 **stochastic gene expression.**

166 The Fisher information matrix (FIM), is a common tool in engineering and statistics  
167 to estimate parameter uncertainties prior to collecting data, and which allows one to find  
168 experimental settings that can make these uncertainties as small as possible [3, 4, 30–33].  
169 Recently, it has been applied to biological systems to estimate kinetic rate parameters in  
170 stochastic gene expression systems [3–6, 34]. In general, the FIM for a single measurement  
171 is defined:

$$\mathcal{I}(\theta) = \mathbb{E} \left\{ (\nabla_{\theta} \log \mathbf{p}(\theta))^T (\nabla_{\theta} \log \mathbf{p}(\theta)) \right\}, \quad (3)$$

172 where  $\log \mathbf{p}(\theta)$  is the log-likelihood of observing that measurement, and the expectation is  
173 taken across over the probability distribution of states  $\mathbf{p}(\theta)$  assuming the specific parameter  
174 set  $\theta$ . As the number of measurements,  $N_c$ , is increased such that maximum likelihood  
175 estimates (MLE) of parameters are unbiased, the distribution of MLE estimates is known  
176 to approach a multivariate Gaussian distribution with a covariance given by the inverse of  
177 the Fisher information matrix, i.e.,

$$\sqrt{N_c}(\hat{\theta} - \theta^*) \xrightarrow{dist} \mathcal{N}(0, \mathcal{I}(\theta^*)^{-1}). \quad (4)$$

178 In [6], we developed the FSP-based Fisher information matrix (FSP-FIM), which allows one  
179 to use the FSP solution,  $\mathbf{p}(t)$ , and the sensitivity matrix,  $\mathbf{S}(t)$ , to find the Fisher information  
180 matrix for stochastic gene expression systems. The dynamics of the sensitivity of each state  
181 in the process to the  $j^{\text{th}}$  kinetic parameter  $\frac{d\mathbf{p}}{d\theta_j}$  is given by:



$$\frac{d}{dt} \begin{bmatrix} \mathbf{p} \\ \mathbf{s}_{\theta_j} \end{bmatrix} = \begin{bmatrix} \mathbf{A}(t) & \mathbf{0} \\ \mathbf{A}_{\theta_j}(t) & \mathbf{A}(t) \end{bmatrix} \begin{bmatrix} \mathbf{p} \\ \mathbf{s}_{\theta_j} \end{bmatrix}, \quad (5)$$

182 where  $\mathbf{A}_j = \frac{\partial \mathbf{A}}{\partial \theta_j}$ . The FSP-FIM at a single time  $t$  is then given by:

$$\mathbf{F}(\boldsymbol{\theta}, t)_{j,k} = \sum_i \frac{1}{p(\mathbf{x}_i; t, \boldsymbol{\theta})} \mathbf{s}_{\theta_j}^i(t) \mathbf{s}_{\theta_k}^i(t), \quad (6)$$

183 where the summation is taken over all states,  $\{\mathbf{x}_i\}$ , included in the FSP analysis (or over  
 184 all observed states,  $\{\mathbf{x}_i^L\}$ , in the case of lumped observations). The FIM for a sequence of  
 185 measurements taken independently (e.g., for smFISH data) at times  $\mathbf{t} = [t_1, t_2, \dots, t_{N_t}]$  is  
 186 then given by the sum across the measurement times:

$$\mathcal{I}(\boldsymbol{\theta}, \mathbf{t}, \mathbf{c}) = \sum_{l=1}^{N_t} c_l \mathbf{F}(\boldsymbol{\theta}, t = t_l), \quad (7)$$

187 where  $\mathbf{c} = [c_1, c_2, \dots, c_{N_t}]$  is the number of cells measured at each  $l^{\text{th}}$  measurement time.  
 188 For smFISH experiments, the vector  $\mathbf{c}$  plays an important role in the design of the study.  
 189 By optimizing over all vectors  $\mathbf{c}$  that sum to  $N_{\text{total}}$ , one can find how many cells should be  
 190 measured at each time point and which time points should be skipped entirely, (i.e.,  $c_l = 0$ ).  
 191 We next verify the FSP-FIM for this stochastic model with a time-varying parameter, and  
 192 later find the optimal  $\mathbf{c}$  for *STL1* mRNA in yeast cells.

## 193 RESULTS

### 194 The FSP-FIM can quantify experimental information for stochastic gene expression 195 under time-varying inputs

196 Our work in [6] was limited to models of stochastic gene expression that had piecewise  
 197 constant reaction rates. Here, we extend this to time-varying reaction rates that affect the  
 198 promoter switching in the system and which lead to time-varying  $\mathbf{A}(t)$  in Eqn. 5. In our  
 199 model, the temporal addition of osmotic shock causes nuclear translocation of HOG-MAPK,  
 200 according to the time-varying function in Eq. 1.

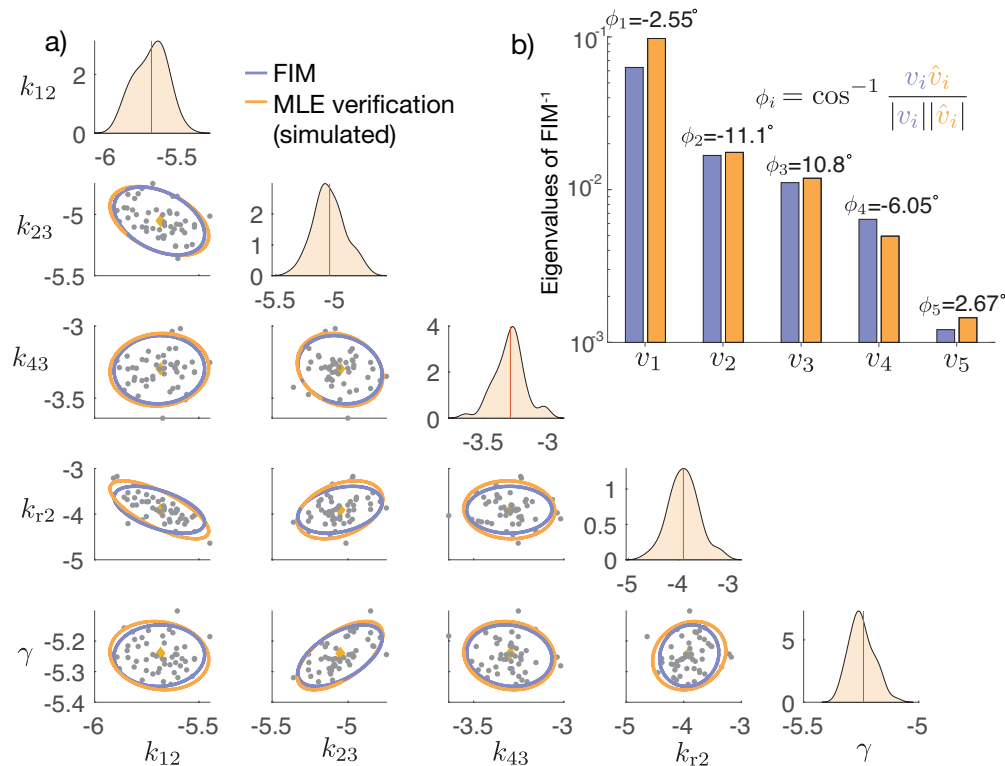

FIG. 2. Verification of the FSP-FIM for the time-varying HOG-MAPK model. (a) Scatter plots and density plots of the spread of MLE estimates for 50 simulated data sets for a subset of model parameters. All parameters are shown in logarithmic scale. The ellipses show the 95% CI for the inverse of the FIM (purple) and covariance of scatter plot (orange). The yellow dots indicate the parameters at which the FIM and simulated data sets were generated. (b) Rank-paired eigenvalues ( $v_i$ ) for the covariance of MLE estimates (orange) and inverse of the FIM (blue). The angles between corresponding rank-paired eigenvectors ( $\phi_i$ ) are shown in degrees.

201 Model parameters simultaneously fit to experimentally measured 0.2M and 0.4M *STL1*  
 202 mRNA were adopted from [9] and used as a reference set of parameters (yellow dots in Fig.  
 203 2a and S1), which we define as  $\theta^*$ . These reference parameters were used to generate 50  
 204 unique and independent simulated data sets, and each  $n^{\text{th}}$  simulated data set was fit to  
 205 find the parameter set,  $\hat{\theta}_n$ , that maximizes the likelihood for that simulated data set. This  
 206 process was repeated for two different experiment designs, including the original intuitive  
 207 design from [9] (results shown in Fig. 2) and an optimized design discussed below (results  
 208 shown in Fig. S1). To ease the computational burden of this fitting, the four parameters  
 209 with the smallest sensitivities and largest uncertainties (i.e., those parameters that had the

210 least effect on the model predictions and which were most difficult to identify) were fixed  
211 at their baseline values. The resulting MLE estimates for the remaining five parameters  
212 were collected into a set of  $\{\hat{\theta}_n\}$  and are shown as yellow dots in Figs. 2 and S1. Using the  
213 asymptotic normality of the maximum likelihood estimator and its relationship to the FIM  
214 (Eq. 4), we then compared the 95% confidence intervals (CIs) of the inverse of the Fisher  
215 information (i.e. the Cramér Rao bound) to those of the MLE estimates (compare the purple  
216 and orange ellipses in Figs. 2a and S1a). We also compared the eigenvalues of the inverse  
217 of the Fisher information,  $\{v_i\}$ , to the correspondingly ranked eigenvalues of the covariance  
218 matrix of MLE estimates,  $\Sigma_{\text{MLE}}$ , in Figs. 2b and S1b. For further validation, we noted that  
219 the principle directions of the ellipses in Figs. 2a and S1a also match for the FIM and MLE  
220 analyses, as quantified by the angle between the paired FIM and  $\Sigma_{\text{MLE}}$  eigenvectors (Figs.  
221 2b and S1b). For comparison, the angles between rank-matched eigenvectors of the FIM  
222 and  $\Sigma_{\text{MLE}}$  were all less than  $12^\circ$ , whereas non rank-matched eigenvectors were all greater  
223 than  $79.9^\circ$ . With the FSP-FIM verified for the HOG-MAPK model, we next explore how  
224 the FIM can be used to optimally allocate the number of cells to measure at each time after  
225 osmotic shock.

## 226 **Designing optimal measurements for the HOG-MAPK pathway in *S. cerevisiae***

227 To explore the use of the FSP-FIM for experiment design in a realistic context of MAPK-  
228 activated gene expression, we again utilize simulated time-course smFISH data for the os-  
229 motic stress response in yeast.

230 We start with a known set of underlying model parameters that were taken from simulta-  
231 neous fits to 0.2M and 0.4M data in [9] (non-spatial model) to establish a baseline parameter  
232 set that is experimentally realistic. These baseline parameters are then used to optimize the  
233 allocation of measurements at different time points  $t = [1, 2, 4, 6, 8, 10, 15, 20, 25, 30, 35, 40, 45, 50, 55]$   
234 minutes after NaCl induction. Specifically, we ask what fraction of the total number of cells  
235 should be measured at each time to maximize the information about a specific subset of  
236 important model parameters. We use a specific experiment design objective criteria referred  
237 to as  $D_s$ -optimality, which corresponds to minimizing the expected volume of the param-  
238 eter space uncertainty for the specific parameters of interest [34], and which is found by  
239 maximizing the product of the eigenvalues of the FIM for those same parameters.

240 Mathematically, our goal is to find the optimal cell measurement allocation,

$$\mathbf{c}_{\text{opt}} = \arg \max_{\mathbf{c}} |\mathcal{I}(\mathbf{c}; \boldsymbol{\theta})|_{D_s} \text{ such that } \sum_{l=1}^{N_t} c_l = 1, \quad (8)$$

241 where  $c_l$  is the fraction of total measurements to be allocated at  $t = t_l$ , and the metric  
242  $|\mathcal{I}(\mathbf{c}; \boldsymbol{\theta})|_{D_s}$  refers to the product of the eigenvalues for the total FIM (Eqn. 7). The fraction  
243 of cells to be measured at each time point,  $\mathbf{c}$  was optimized using a greedy search, in which  
244 single-cell measurements were chosen one at a time according to which time point predicted  
245 the greatest improvement in the optimization criteria (see Supplementary Note 3 for more  
246 information).

247 To illustrate our approach, we first allocated cell measurements according to  $D_s$ -  
248 optimality as found through this greedy search. Figure 3 shows the optimal fraction of  
249 cells to be measured at each time following a 0.2M NaCl input and compares these fractions  
250 to the experimentally measured number of cells from [9]. While each available time point  
251 was allocated a non-zero fraction of measurements, three time points at  $t = [10, 15, 30]$   
252 minutes were vastly more informative than the other potential time points. To verify this  
253 result, we simulated 50 data sets of 1,000 cells each and found the MLE estimates for each  
254 sub-sampled data set. We compared the spread of these MLE estimates to the inverse of  
255 the optimized FIM, shown in Fig. S1.

256 Comparing Figs. S1 with Fig. 2 illustrates the increase in information of the optimal  
257 0.2M experiment compared to the intuitively designed experiment from [9]. In addition to  
258 providing much higher Fisher information, the optimal experiment requires measurement of  
259 only three time points compared to the 16 time points that were measured in the original  
260 experiment. Furthermore, we note that the FIM prediction of the MLE uncertainty is more  
261 accurate for the simpler optimal design, which is likely related to our observation that MLE  
262 estimates converge more easily for the optimized experiment design than they do for original  
263 intuitive design.

264 Figure 4 next compares the  $D_s$ -optimality criteria for the optimal (solid horizontal lines)  
265 and intuitive ([9], dashed horizontal lines) experiment designs to 1,000 randomly designed  
266 experiments for the 0.2M (black) and 0.4M (gray) conditions. To generate these random  
267 experiment designs, we selected a random subset of the measurement times, and allocated  
268 the total 1,000 cells among chosen time points using multinomial distribution with equal

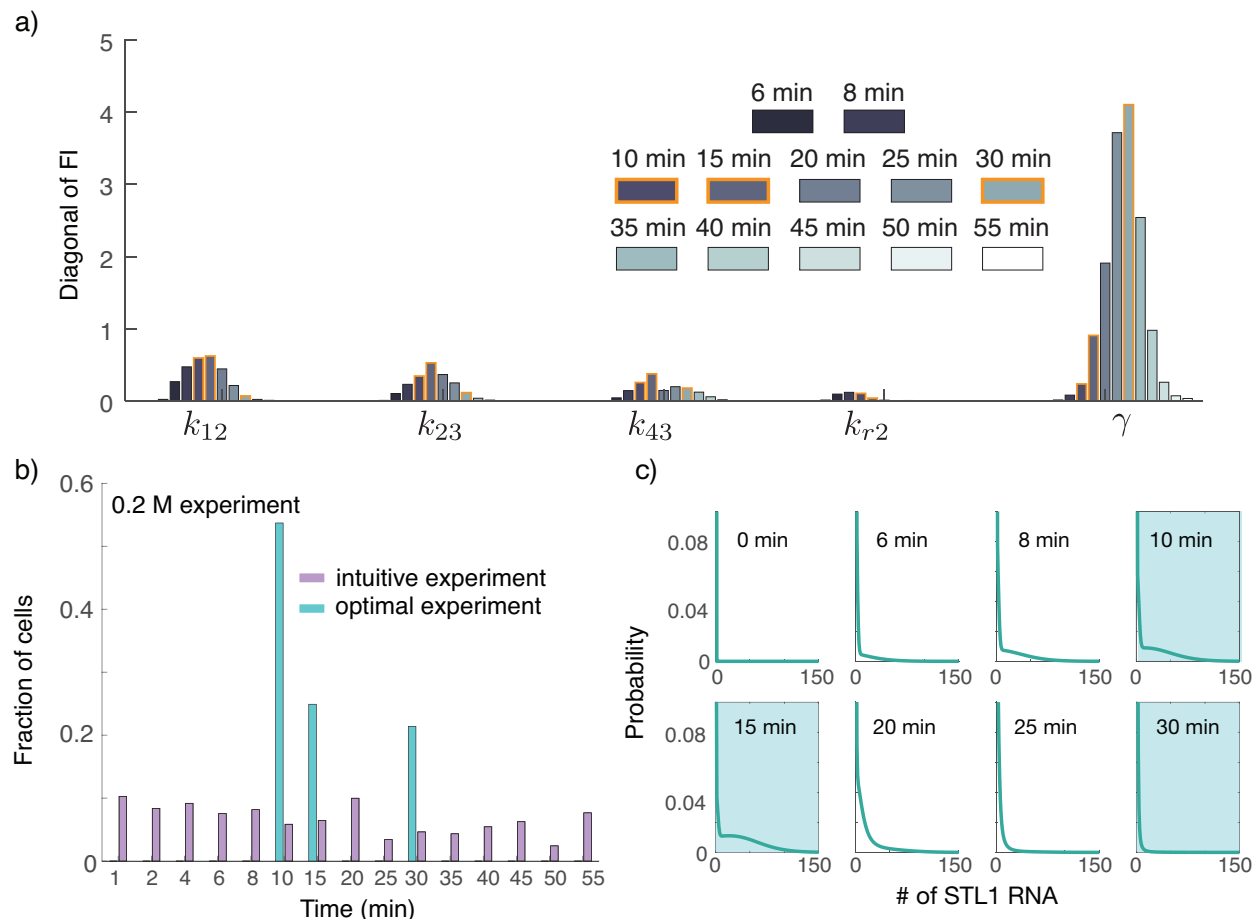

FIG. 3. *Optimizing the allocation of cell measurements at different time points.* (a) Diagonal entries of the Fisher information at different measurement times. The optimal measurement times  $t = [10, 15, 30]$  minutes are highlighted in orange. (b) Comparison of optimal fractions cells to measure (blue) at different time points determined by the FSP-FIM compared to experimentally measured numbers of cells at 0.2 M NaCl (purple) from our work in [9]. (c) Probability distributions of *STL1* mRNA at several of measurement times. The blue boxes denote the time points of optimal measurements.

269 probability for each time point. Figures 4a-b show that the intuitive experiment is more  
 270 informative than most random experiments, but is still substantially less informative than  
 271 the optimal experiment. To explore the importance of knowing the exact process input  
 272 dynamics prior to designing the experiment, we next asked how well an experiment design  
 273 optimized for a 0.2M osmotic shock would do to estimate parameters using an 0.4M experi-

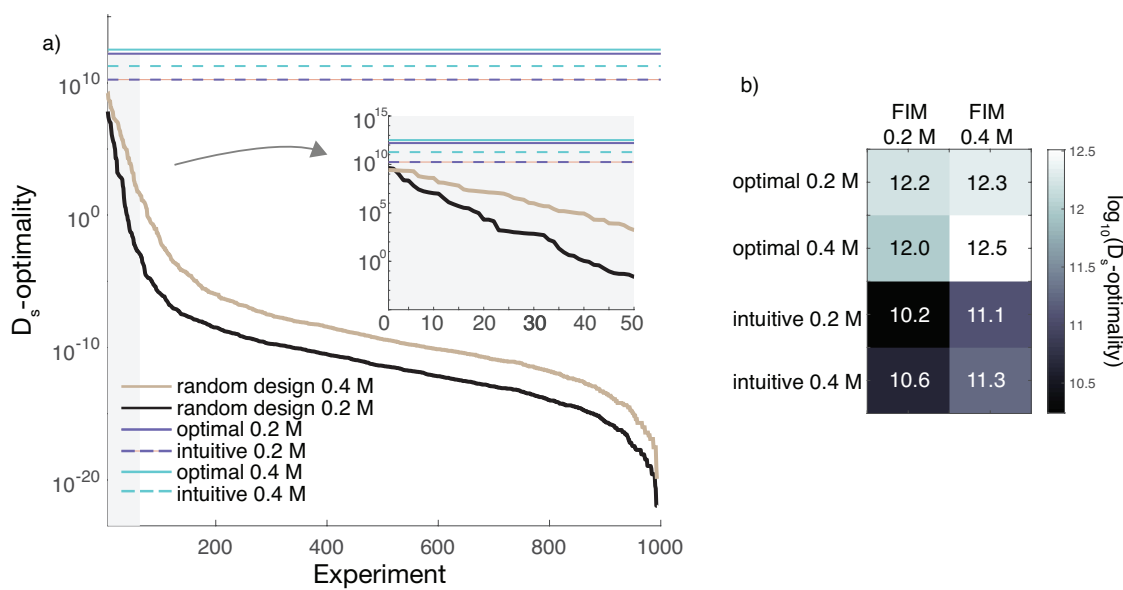

FIG. 4. Information gained by performing optimal experiments compared to actual experiments

(a)  $D_s$ -optimality for optimal design using three time points compared to the intuitive experiment design made using 16 time points (purple, 0.2M and blue, 0.4M). Dashed lines represent intuitive experiment designs. Randomly designed experiments with 0.2 M and 0.4 M NaCl are shown in black and gray. For the random experiments, the time points were selected by sampling them from the experimental measurement times, and then a random number of measurements were assigned to each selected time point. The inset shows the first 50 randomly designed experiments. (b) The  $D_s$ -optimality for different experiment designs (y-axis) computed using the Fisher information for either the 0.2 M perturbation or the 0.4 M NaCl perturbation.

274 ment and vice-versa. Figure 4b shows that the simpler optimal experiment designs perform  
 275 better than the intuitive designs in all cases, even when the design was found assuming a  
 276 different environmental condition.

#### 277 Using the FSP-FIM to design optimal biosensor measurements.

278 Thus far, and throughout our previous work in [6], we have sought to find the optimal  
 279 set of experiments to reduce uncertainty in the estimates of *model parameters*. In this  
 280 section, we discuss how the FSP-FIM allows for the optimization of experiment designs to  
 281 address a more general problem of inferring *environmental variables* from cellular responses.

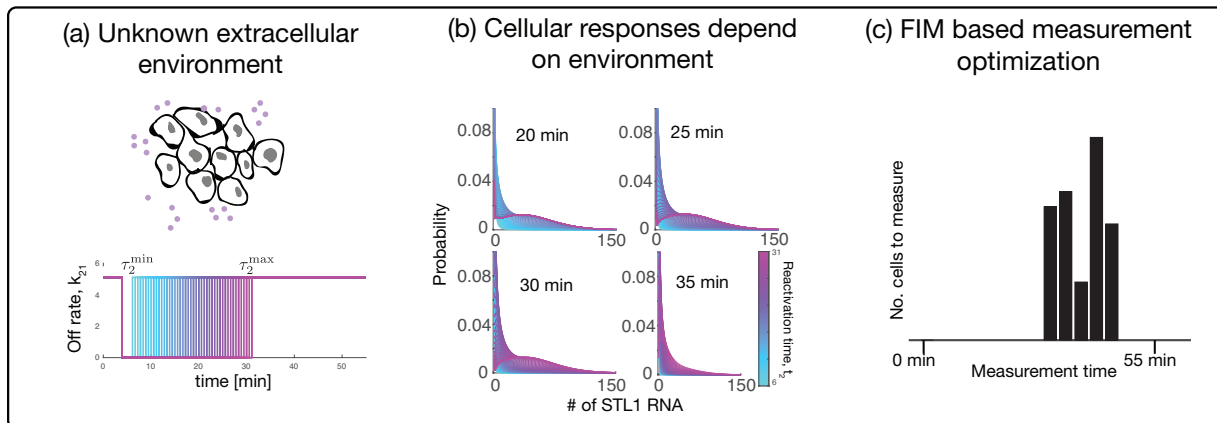

FIG. 5. Overview of optimal design for biosensing experiments for the osmotic stress response in yeast. (a) Unknown salt concentrations (purple dots) in the environment give rise to different reactivation times,  $\tau_2$ , which affect the gene expression in the model through the rate  $k_{21}$ . These different reactivation times cause downstream *STL1* expression dynamics to behave differently as shown in panel (b). (c) Different responses can be used to resolve experiments that reduce the uncertainty in  $\tau_2$ .

282 Toward this end, we assume a known and parametrized model (i.e., the model defined above,  
 283 which was identified previously in [9]), but which is now subject to unknown environmental  
 284 influences. We explore what would be the optimal experimental measurements to take to  
 285 characterize these influences. Specifically, we ask how many cells should be measured using  
 286 smFISH, and at what times, to determine the specific concentration of NaCl to which the  
 287 cells have been subjected at  $t = 0$  – or, equivalently, we ask what experiments would be  
 288 best suited to measure the effective stress induction level caused by addition of an unknown  
 289 solution to the cells.

290 In the HOG-MAPK transcription model, extracellular osmolarity ultimately affects stress  
 291 response gene transcription levels through the time-varying parameter  $k_{21}(t)$  in Eq. 1, and  
 292 Fig. 1b shows the effect 0.2M and 0.4M salt concentrations on  $k_{21}$  activation. Higher salt  
 293 concentrations delay the time at which  $k_{21}(t)$  returns to its nonzero value, and the function  
 294 in Eq. 1 is well-approximated by a the sum of three Heaviside step functions,  $u(t - \tau_i)$  as:

$$k_{21}(t) = k_{21}^0 (u(t) - u(t - \tau_1) + u(t - \tau_2)), \quad (9)$$

295 where  $\tau_1$  is the fixed delay of the time it takes for nuclear kinase levels to reach the  $k_{21}$

296 deactivation threshold (about 1 minute or less, [8, 9]), and  $\tau_2$  is the variable time it takes  
 297 for the nuclear kinase to drop back below that threshold. In practice, the threshold-crossing  
 298 time,  $\tau_2$ , is directly related to the salt concentration experienced by the cell under reasonable  
 299 salinity levels. This relationship is shown in Fig. 1b and 5b, where a 0.2M NaCl input exhibits  
 300 a shorter  $\tau_2$  than does a 0.4M input. For our analyses, we assume a prior uncertainty such  
 301 that time  $\tau_2$  can be any value uniformly distributed between  $\tau_2^{\min} = 6$  and  $\tau_2^{\max} = 31$  minutes,  
 302 and our goal is to find the experiment that best reduces the posterior uncertainty in  $\tau_2$  (and  
 303 therefore the concentration of NaCl).

304 To reformulate the FSP-FIM to estimate uncertainty in  $\tau_2$  given our model, the first  
 305 step is to compute the sensitivity of the distribution of mRNA abundance to changes in the  
 306 variable  $\tau_2$  using Eqn. 5, in which  $\mathbf{A}_{\theta_j}(t)$  is replaced with  $\mathbf{A}_{\tau_2}(t) = \frac{\partial \mathbf{A}}{\partial \tau_2}$  as follows:

$$\frac{d}{dt} \begin{bmatrix} \mathbf{p} \\ \mathbf{s}_{\tau_2} \end{bmatrix} = \begin{bmatrix} \mathbf{A}(t) & \mathbf{0} \\ \mathbf{A}_{\tau_2}(t) & \mathbf{A}(t) \end{bmatrix} \begin{bmatrix} \mathbf{p} \\ \mathbf{s}_{\tau_2} \end{bmatrix}. \quad (10)$$

307 As  $k_{21}(t)$  is the only parameter in  $\mathbf{A}$  that depends explicitly on  $\tau_2$ , all entries of  $\frac{\partial \mathbf{A}}{\partial \tau_2}$  are zero  
 308 except for those which depend on  $k_{21}(t)$ , and

$$\mathbf{A}_{\tau_2}(t) = \frac{\partial \mathbf{A}}{\partial k_{21}} \frac{\partial k_{21}}{\partial \tau_2} = \mathbf{A}_{k_{21}} k_{21}^0 \delta(\tau_2), \quad (11)$$

309 and therefore  $\mathbf{A}_{\tau_2} = \frac{\partial \mathbf{A}}{\partial \tau_2}$  is non-zero only at  $t = \tau_2$ . Using this fact, the equation for the  
 310 sensitivity dynamics is uncoupled from the FSP dynamics for  $t \neq \tau_2$ , and can be written  
 311 simply as:

$$\frac{d}{dt} \mathbf{s}_{\tau_2} = \begin{cases} \mathbf{0} & \text{for } t < \tau_2 \text{ with } \mathbf{s}(0) = \mathbf{0} \\ \mathbf{A}(t) \mathbf{s}_{\tau_2} & \text{for } t > \tau_2 \text{ with } \mathbf{s}_{\tau_2}(\tau_2) = k_{21}^0 \mathbf{A}_{k_{21}} \mathbf{p}(\tau_2) \end{cases}. \quad (12)$$

312 If the Fisher information at each measurement time is written into a vector  $\mathbf{f} =$   
 313  $[f_1, f_2, \dots, f_{N_t}]$  (noting that the Fisher information at any time  $t_l$  is the scalar quantity,  
 314  $f_l$ ), and the number of measurements per time point is the vector,  $\mathbf{c} = [c_1, c_2, \dots, c_{N_t}]$ , then  
 315 the total information for a given value of  $\tau_2$  can be computed as the dot product of these  
 316 two vectors,



$$\mathcal{I}(\tau_2) = \sum_{l=1}^{N_t} c_l f_l = \mathbf{c}^T \mathbf{f}. \quad (13)$$

317 Our goal is to find an experiment that is optimal to determine the value of  $\tau_2$ , given an  
 318 assumed prior that  $\tau_2$  is sampled from a uniform distribution between  $\tau_2^{\min}$  and  $\tau_2^{\max}$ . To  
 319 find the experiment  $\mathbf{c}_{\text{opt}}$  that will reduce our posterior uncertainty in  $\tau_2$ , we integrate the  
 320 inverse of the FIM in Eq. 13 over the prior uncertainty in  $\tau_2$ ,

$$\mathbf{c}_{\text{opt}} = \arg \min_{\mathbf{c}, \sum c_l = 1} \int_{\tau_2^{\min}}^{\tau_2^{\max}} \frac{1}{\tau_2^{\max} - \tau_2^{\min}} \mathcal{I}^{-1}(\mathbf{c}; \tau_2 = \tau, \boldsymbol{\theta}) d\tau \quad (14)$$

$$= \arg \min_{\mathbf{c}, \sum c_l = 1} \int_{\tau_2^{\min}}^{\tau_2^{\max}} \mathcal{I}^{-1}(\mathbf{c}; \tau_2 = \tau, \boldsymbol{\theta}) d\tau. \quad (15)$$

321 For later convenience, we define the integral in Eq. 14 (i.e., the objective function of the  
 322 minimization) by the symbol  $\mathcal{J}$ , which corresponds to the expected uncertainty about the  
 323 value of  $\tau_2$  for a given  $\mathbf{c}$ .

324 Next, we apply the greedy search from above to solve the minimization problem in Eqn.  
 325 15 to find the experiment design  $\mathbf{c}_{\text{opt}}$  that minimizes the estimation error of  $\tau_2$ . Figure 6  
 326 shows examples of seven different experiments to accomplish this task, ranked according  
 327 to the FSP-FIM value  $\mathcal{J}$  from most informative (top left) to least informative (bottom  
 328 right), but all using the same number of measured cells. For each experiment, the FSP-FIM  
 329 was used to estimate the posterior uncertainty (i.e., expected standard deviation) in the  
 330 estimation of  $\tau_2$ , which is shown by the orange bars in Fig. 6. To verify these estimates, we  
 331 then chose 64 uniformly spaced values of  $\tau_2$ , which we denote as the set  $\{\tau_2^{\text{true}}\}$ , and for each  
 332  $\tau_2^{\text{true}}$ , we simulated 50 random data sets of 1,000 cells distributed according to the specified  
 333 experiment designs. For each of the  $64 \times 50$  simulated data sets, we then determined the value  
 334  $\tau_2^{\text{MLE}}$  between  $\tau_2^{\min}$  and  $\tau_2^{\max}$  that maximized the likelihood of the simulated data according  
 335 to Eq. 2. The root mean squared estimate (RMSE) error over all random values of  $\tau_2^{\text{true}}$  and  
 336 estimates,  $\sqrt{\langle (\tau_2^{\text{MLE}} - \tau_2^{\text{true}})^2 \rangle}$ , was then computed for each of the six different experiment  
 337 designs. Figure 6 shows that the FIM-based estimation of uncertainty and the actual MLE-  
 338 based uncertainty are in excellent agreement for all experiments (compare purple and orange  
 339 bars). Moreover, it is clear that the optimal design selected by the FIM-analysis performed  
 340 much better to estimate  $\tau_2$  than did the uniform or random experimental designs. A slightly

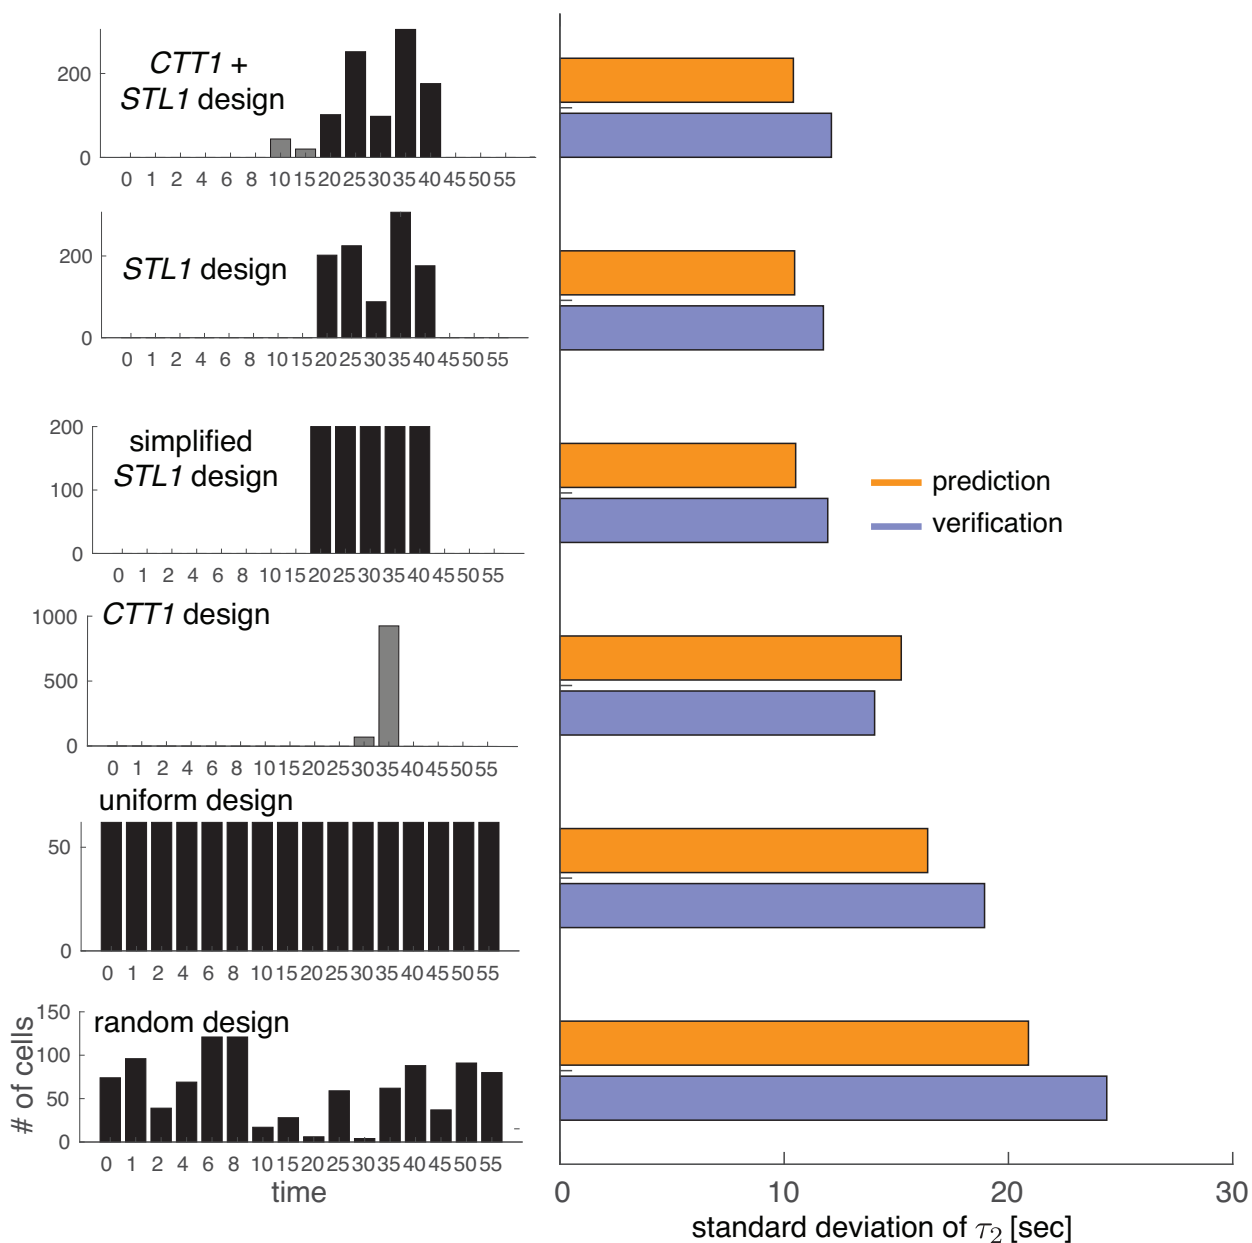

FIG. 6. Verification of the uncertainty in  $\tau_2$  for different experiment designs. The left panel shows various experiment designs, where the sum of the bars (i.e., the total number of measurements) is 1,000. Gray bars represent the measurements of *CTT1* and black bars *STL1*. The right panel shows the value of the objective function in Eq. 14 for each experiment design in orange, and the MSE values for verification are shown in purple.

341 simplified design, which uses the same time points as the optimal, but with equal numbers  
 342 of measurements at each time, performed nearly as well as the optimal design.

343 The set of experiment designs shown in Fig. 6 includes the best design that only uses  
344 *STL1* (second from top), the best design that uses only *CTT1* (fourth from top), and the best  
345 designs that uses some cells with *CTT1* and some with *STL1* (top design). To find the best  
346 experiment design for measurement of two different genes, we assumed that at each time,  
347 either *STL1* mRNA or *CTT1* mRNA (but not both) could be measured, corresponding to  
348 using smFISH oligonucleotides for either *STL1* or *CTT1*. To determine which gene should  
349 be measured at each time, we compute the Fisher information for *CTT1* and *STL1* for every  
350 measurement time and averaged this value over the range of  $\tau_2$ . For each measurement time  
351  $t_i$ , the gene is selected that has the higher average Fisher information for  $\tau_2$ . The number  
352 of cells per measurement time were then optimized as before, except the choice to measure  
353 *CTT1* or *STL1* was based on which mRNA had the larger Fisher information (Eq. 13) at that  
354 specific point in time. The best *STL1*-only experiment design was found to yield uncertainty  
355 of 10.5 seconds (standard deviation); the best *CTT1*-only experiment was found to yield an  
356 uncertainty of 15.2 seconds and the best mixed *STL1/CTT1* experiment design was found  
357 to yield an uncertainty of 10.4 seconds. In other words, for this case the *STL1* gene was  
358 found to be much more informative of the environmental condition than was *CTT1*, and the  
359 use of both *STL1* and *CTT1* provides only minimal improvement beyond the use of *STL1*  
360 alone. We note that although measurement times in the optimized experiment design were  
361 restricted to a resolution of five minutes or more, the value of  $\tau_2$  could be estimated with  
362 an error of only 10 seconds, corresponding to a roughly 30-fold improvement of temporal  
363 resolution beyond the allowable sampling rate.

## 364 DISCUSSION

365 The methods developed in this work present a principled, model-driven approach to  
366 allocate how many snapshot single-cell measurements should be taken at each time during  
367 analysis of a time-varying stochastic gene regulation system. We demonstrate and verify  
368 these theories on a well-established model of osmotic stress response in yeast cells, which  
369 is activated upon the nuclear localization of phosphorylated HOG1 [8, 9]. For this system,  
370 we showed how to optimally allocate the number of cells measured at each time so as to  
371 maximize the information about a subset of model parameters. We found that the optimal  
372 experiment design to estimate model parameters for the *STL1* gene only required three time

373 points. Moreover, these three time points ( $t = [10, 15, 30]$  minutes, highlighted by blue in  
374 Fig. 3b) are at biologically meaningful time points. At  $t = 10$  and 15 minutes, the system is  
375 increasing to maximal expression, and the probability of measuring a cell with elevated of  
376 RNA is high, which helps reduce uncertainty about the parameters in the model that control  
377 maximal expression. Similarly, at the final experiment time of  $t = 30$  minutes, the system  
378 is starting to shut down gene expression, and therefore this time is valuable to learn about  
379 the time scale of deactivation in the system as well as the mRNA degradation rate. These  
380 effects are clearly illustrated in Fig. 3a, which shows that times  $t = 10$  and  $t = 15$  minutes  
381 provide the most information about parameters  $k_{12}$ ,  $k_{23}$  and  $k_{43}$ , whereas measurements at  
382  $t = 30$  minutes provide the most information about  $\gamma$ . Because  $\gamma$  is the easiest parameter to  
383 estimate (e.g., its information is greater), not as many cells are needed at  $t = 30$  minutes to  
384 constrain that parameter. Similarly, because  $k_{r2}$  is the most difficult parameter to estimate  
385 (e.g., it has the lowest information across all experiments), and because  $t = 10$  minutes  
386 is one of the few time points to provide information about  $k_{r2}$ , the optimal experimental  
387 design selects a large number of cells at the time  $t = 10$  minutes. This analysis demonstrates  
388 that the optimal experiment design can change depending upon which parameters are most  
389 important to determine (e.g.,  $\gamma$  or  $k_{r2}$  in this case), a fact that we expect will be important  
390 to consider in future experiment designs.

391 Because we constrained all potential experiment designs to be within the subset of ex-  
392 periments performed in our previous work [9], we are able to compare the information of  
393 optimal experiment designs to intuitive designs that have actually been performed. We  
394 found that while the intuitive experiments performed were almost always better than could  
395 be expected by random chance, they still provided several orders of magnitude lower Fisher  
396 information than would be possible with optimal experiments (Fig. 4a). Moreover, in our  
397 analyses, we found that optimal designs could require far fewer time points than those de-  
398 signed by intuition (e.g., only three time points were needed in Fig. 3), and therefore these  
399 designs can be much easier and less expensive to conduct. We also found that utility of  
400 optimal experiment designs could be relatively insensitive to variation in the experimental  
401 conditions compared to assumptions used in the experiments design (Fig. 4b), a fact that  
402 allows for effective experiment designs despite inaccurate prior assumptions.

403 In addition to suggesting optimal experiments to identify model parameters, we showed  
404 that the FSP-FIM combined with an existing model could be used to design optimal exper-

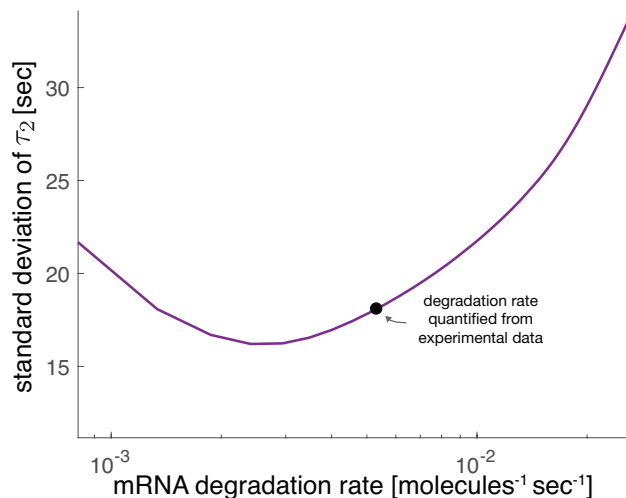

FIG. 7. *Optimal mRNA degradation rates to reduce uncertainty about the extracellular environment.* Uncertainty in the time at which the *STL1* gene turns off,  $\tau_2$ , as a function of mRNA degradation rate (purple). The black dot corresponds to the degradation rate that was quantified from experimental data.

405 iments to learn about fluctuating extracellular environments (Figs. 5 and 6). Along a very  
406 similar line of reasoning, one can also adapt the FSP-FIM analysis to learn what biological  
407 design parameters would be optimal to reduce uncertainty in the estimate of important envi-  
408 ronmental variables. For example, Fig. 7 shows the expected uncertainty in  $\tau_2$  as a function  
409 of the degradation rate of the *STL1* gene assuming that 50 cells could be measured at each  
410 experimental measurement time  $t = [1, 2, 4, 6, 8, 10, 15, 20, 25, 30, 35, 40, 45, 50, 55]$  minutes  
411 using the smFISH approach. We found that the best choice for *STL1* degradation rate to  
412 most accurately determine the extracellular fluctuations would be  $2.4 \times 10^{-3}$  mRNA/min,  
413 which is about half of the experimentally determined value of  $5.3 \times 10^{-3} \pm 5.9 \times 10^{-5}$  from  
414 [9]. This result is consistent with our earlier finding that the faster degrading *STL1* mRNA  
415 is a much better determinant of the HOG1 dynamics than is the slower-degrading *CTT1*  
416 mRNA, and suggests that other less stable mRNA could be more effective still. We ex-  
417 pect that similar, future applications of the FSP-based Fisher information to be valuable in  
418 other systems and synthetic biology contexts where scientists seek to explore how different  
419 cellular properties affect the transmission of information between cells or from cells to hu-  
420 man observers. Indeed, similar ideas have been explored recently using classical information  
421 theory in [35–37], and recent work in [38] has noted the close relationship between Fisher

422 information and the channel capacity of biochemical signaling networks.

423 We expect that computing optimal experiment designs for time-varying stochastic gene  
424 expression creates opportunities that could extend well beyond the examples presented in  
425 this work. Modern experimental systems are making it much easier for scientists and engi-  
426 neers to precisely perturb cellular environments using chemical induction [39–41] or optoge-  
427 netic control [42–44]. Many such experiments involve stochastic bursting behaviors at the  
428 mRNA or protein level [7–9, 43], and precise optimal experiment design will be crucial to  
429 understand the properties of stochastic variations in such systems. A related field that is  
430 also likely to benefit from such approaches is biomolecular image processing and feedback  
431 control, for which one may need to decide in real time which measurements to make and in  
432 what conditions.

#### 433 DATA AVAILABILITY

434 All data and codes associated with this article will be made available upon acceptance of  
435 the article at: [https://github.com/MunskyGroup/fox\\_et\\_al\\_complexity\\_2019](https://github.com/MunskyGroup/fox_et_al_complexity_2019).

#### 436 ACKNOWLEDGEMENTS

437 ZRF and BEM were supported by National Institutes of Health [R35 GM124747]. ZRF  
438 was also supported by the Agence Nationale de la Recherche [ANR-18-CE91-0002, Cy-  
439 berCircuits]. GN was supported by National Institutes of Health [DP2 GM11484901,  
440 R01GM115892] and Vanderbilt Startup Funds. The presented analyses used the computa-  
441 tional resources of the W M Keck High Performance Compute Cluster supported under a  
442 W M Keck Foundation Award. The content is solely the responsibility of the authors and  
443 does not necessarily represent the official views of the funding agencies.

- 
- 444 [1] J. Liepe, S. Filippi, M. Komorowski, and M. P. H. Stumpf, PLOS Computational Biology **9**,  
445 1 (2013).  
446 [2] J. F. Apgar, D. K. Witmer, F. M. White, and B. Tidor, Molecular BioSystems **6**, 1890 (2010).  
447 [3] J. Ruess, A. Milias-Argeitis, and J. Lygeros, Journal of The Royal Society Interface **10** (2013).

- 448 [4] M. Komorowski, M. J. Costa, D. A. Rand, and M. P. H. Stumpf, Proceedings of the National  
449 Academy of Sciences of the United States of America **108**, 8645 (2011).
- 450 [5] C. Zimmer, PloS One **11**, e0159902 (2016).
- 451 [6] Z. R. Fox and B. Munsky, PLoS computational biology **15**, e1006365 (2019).
- 452 [7] C. Zechner, J. Ruess, P. Krenn, S. Pelet, M. Peter, J. Lygeros, and H. Koepl, Proceedings  
453 of the National Academy of Sciences **109**, 8340 (2012).
- 454 [8] G. Neuert, B. Munsky, R. Z. Tan, L. Teytelman, M. Khammash, and A. van Oudenaarden,  
455 Science **339**, 584 (2013).
- 456 [9] B. Munsky, G. Li, Z. R. Fox, D. P. Shepherd, and G. Neuert, Proceedings of the National  
457 Academy of Sciences of the United States of America **163**, 201804060 (2018).
- 458 [10] A. Raj, P. van den Bogaard, S. A. Rifkin, A. van Oudenaarden, and S. Tyagi, Nature Methods  
459 **5**, 877 (2008).
- 460 [11] A. M. Femino, F. S. Fay, K. Fogarty, and R. H. Singer, Science **280**, 585 (1998).
- 461 [12] N. Tsanov, A. Samacoits, R. Chouaib, A.-M. Traboulsi, T. Gostan, C. Weber, C. Zimmer,  
462 K. Zibara, T. Walter, M. Peter, E. Bertrand, and F. Mueller, Nucleic Acids Research **44**,  
463 e165 (2016), <http://oup.prod.sis.lan/nar/article-pdf/44/22/e165/25365000/gkw784.pdf>.
- 464 [13] Sharifian, Hoda, Lampert, Fabienne, Stojanovski, Klement, Regot, Sergi, Vaga, Stefania,  
465 Buser, Raymond, Lee, Sung Sik, Koepl, Heinz, Posas, Francesc, Pelet, Serge, and Peter,  
466 Matthias, Integrative Biology : Quantitative Biosciences from Nano to Macro **7**, 412 (2015).
- 467 [14] Klipp, Edda, Nordlander, Bodil, Krüger, Roland, Gennemark, Peter, and Hohmann, Stefan,  
468 Nature Biotechnology **23**, 975 (2005).
- 469 [15] B. Schoeberl, C. Eichler-Jonsson, E. D. Gilles, and G. Müller, Nature biotechnology **20**, 370  
470 (2002).
- 471 [16] Muzzey, Dale, Gómez-Uribe, Carlos A, Mettetal, Jerome T, and van Oudenaarden, Alexander,  
472 Cell **138**, 160 (2009).
- 473 [17] Saito, Haruo and Posas, Francesc, Genetics **192**, 289 (2012).
- 474 [18] S. Pelet, F. Rudolf, M. Nadal-Ribelles, E. de Nadal, F. Posas, and M. Peter, Science (New  
475 York, N.Y.) **332**, 732 (2011).
- 476 [19] B. Munsky, Z. Fox, and G. Neuert, Methods **85**, 12 (2015).
- 477 [20] Zechner, Christoph, Unger, Michael, Pelet, Serge, Peter, Matthias, and Koepl, Heinz, Nature  
478 methods **11**, 197 (2014).

- 479 [21] R. M. Kumar, P. Cahan, A. K. Shalek, R. Satija, A. J. Daley, Keyser, H. Li, J. Zhang,  
480 K. Pardee, D. Gennert, J. J. Trombetta, T. C. Ferrante, A. Regev, G. Q. Daley, and J. J.  
481 Collins, *Nature* **516**, 56 (2014).
- 482 [22] L. S. Weinberger, J. C. Burnett, J. E. Toettcher, A. P. Arkin, and D. V. Schaffer, *Cell* **122**,  
483 169 (2005).
- 484 [23] B. Munsky, G. Neuert, and A. van Oudenaarden, *Science* **336**, 183 (2012).
- 485 [24] N. G. Van Kampen and N. Godfried, *Stochastic processes in physics and chemistry* (Elsevier,  
486 1992).
- 487 [25] D. T. Gillespie, *The Journal of Physical Chemistry* **81**, 2340 (1977).
- 488 [26] A. Singh and J. P. Hespanha, *IEEE Transactions on Automatic Control* **56**, 414 (2011).
- 489 [27] B. Munsky and M. Khammash, *The Journal of Chemical Physics* **124**, 044104 (2006).
- 490 [28] Z. Fox, G. Neuert, and B. Munsky, *Journal of Chemical Physics* **145** (2016).
- 491 [29] M. Gomez-Schiavon, L.-F. Chen, A. E. West, and N. E. Buchler, *Genome biology* **18**, 164  
492 (2017).
- 493 [30] S. M. Kay, *Fundamentals of Statistical Signal Processing: Estimation Theory* (Prentice-Hall,  
494 Inc., Upper Saddle River, NJ, USA, 1993).
- 495 [31] G. Casella and R. L. Berger, *Statistical inference* (Wadsworth and Brooks/Cole, Pacific Grove,  
496 CA, 1990).
- 497 [32] C. Kreutz and J. Timmer, *The FEBS Journal* **276**, 923 (2009).
- 498 [33] B. Steiert, A. Raue, J. Timmer, and C. Kreutz, *PloS One* **7**, e40052 (2012).
- 499 [34] J. Ruess, F. Parise, A. Miliadis-Argeitis, M. Khammash, and J. Lygeros, *Proceedings of the*  
500 *National Academy of Sciences of the United States of America* **112**, 8148 (2015).
- 501 [35] R. Cheong, A. Rhee, C. J. Wang, I. Nemenman, and A. Levchenko, *Science (New York, N.Y.)*  
502 **334**, 354 (2011).
- 503 [36] R. Suderman, J. A. Bachman, A. Smith, P. K. Sorger, and E. J. Deeds, *Proceedings of the*  
504 *National Academy of Sciences of the United States of America* **114**, 5755 (2017).
- 505 [37] J. Selimkhanov, B. Taylor, J. Yao, A. Pilko, J. Albeck, A. Hoffmann, L. Tsimring, and  
506 R. Wollman, *Science (New York, N.Y.)* **346**, 1370 (2014).
- 507 [38] T. Jetka, K. Nienaltowski, S. Filippi, M. P. H. Stumpf, and M. Komorowski, *Nature Com-*  
508 *munications* **9**, 4591 (2018).



- 509 [39] Ng, Andrew H, Nguyen, Taylor H, Gomez-Schiavon, Mariana, Dods, Galen, Langan, Robert  
510 A, Boyken, Scott E, Samson, Jennifer A, Waldburger, Lucas M, Dueber, John E, Baker,  
511 David, and El-Samad, Hana, *Nature* **572**, 265 (2019).
- 512 [40] A. Thiemicke, H. Jashnsaz, G. Li, and G. Neuert, *Scientific reports* **9**, 10129 (2019).
- 513 [41] J.-B. Lugagne, S. Sosa Carrillo, M. Kirch, A. Köhler, G. Batt, and P. Hersen, *Nature Com-*  
514 *munications* **8**, 1671 (2017).
- 515 [42] R. Chait, J. Ruess, T. Bergmiller, G. Tkačik, and C. C. Guet, *Nature Communications* **8**,  
516 2557 (2017).
- 517 [43] M. Rullan, D. Benzinger, G. W. Schmidt, A. Miliás-Argeitis, and M. Khammash, *Molecular*  
518 *Cell* **70**, 745 (2018).
- 519 [44] S. M. Castillo-Hair, E. A. Baerman, M. Fujita, O. A. Igoshin, and J. J. Tabor, *Nature*  
520 *Communications* **10**, 3099 (2019).
